# Supplementary material
Source: PubMed Central journal article supplement (PMC2852930)

## Supplemental Figure legends

### Supplemental Figure 1. Screening data pertaining to hybridomas.

First, 55 of 800 clones were selected for screening; subsequently, 24 of the 55 clones were selected owing to their viability and high reactivity with Gdn(-) or (+) materials. Among these 24 clones, 3 predominantly reacted with the Gdn(-) antigen. The characteristics of clone 1B12 changed during the limited dilution, probably as a result of isolation.

### Supplemental Figure 2. Immunoblotting of PrPs with generated mAbs.

MAbs 2C4, 3B7, 3H6, and 4G4 (not reported in this paper because of instability of hybridoma) and 1B12 did not react with denatured PrPs. In contrast, mAbs Y3A6, X5C12, and X2H6, which were highly reactive to the Gdn(+) antigen, as determined using the screening tests (Suppl. Fig 1), reacted with PrPs in immunoblots like mAb T2.

### Supplemental Figure 3. Epitope mapping by peptide array.

Reactivity of generated mAbs to synthetic peptide arrays on the cellulose support used for epitope mapping in a previous study (1) were shown. In the case of the generated mAbs, no positive spot was observed after long exposure to the arrays. In contrast, several spots were detected in the case of the non-conformational mAb X2H6 (Suppl. Figs. 1 and 2) after a short exposure.

### Supplemental Figure 4. PrPs immunoprecipitated from the brain homogenates of various species.

Representative immunoblots used to calculate the data shown in Table 2.

### Supplemental Figure 5. PK resistance of PrP<sup>core</sup> analyzed using immunoblotting.

Immunoblotting was performed using PrP<sup>core</sup> samples that were obtained from serially passaged mice and subjected to long-term PK (LTPK) digestion as described in Experimental Procedures. *A.* Immunoblots of PrP<sup>core</sup> subjected to LTPK digestion. *B.* Degradation of PrP<sup>core</sup> after LTPK digestion. The average intensity of each band calculated from the results of two separate experiments has been plotted. Degradation curves were classified into two groups based on the passage number (second and third passages) as well as the results of ELISA (Fig. 2).

### Supplemental Figure 6. Sequential immunoprecipitation of PrP<sup>Sc</sup> obtained from mice in the 3rd passage.

The PrP<sup>Sc</sup> in the unbound supernatant after the first immunoprecipitation assay was re-precipitated with an equal amount of mAb 3H6 or concentrated using a 2-butanol/methanol mixture (2) and detected by immunoblotting. The amount of PrP<sup>Sc</sup> bound to mAb 3H6 decreased even though a sufficient quantity of PrP<sup>Sc</sup> was present in the supernatant.

## Supplemental Figure reference

1. Yokoyama, T., Kimura, K. M., Ushiki, Y., Yamada, S., Morooka, A., Nakashiba, T., Sassa, T., and Itohara, S. (2001) *J. Biol. Chem.* **276**, 11265–11271
2. Iwata, N., Sato, Y., Higuchi, Y., Nohtomi, K., Nagata, N., Hasegawa, H., Tobiume, M., Nakamura, Y., Hagiwara, K., Furuoka, H., Horiuchi, M., Yamakawa, Y. and Sata, T. (2006) *Jpn. J. Infect. Dis.* **59**, 100-107

Supplemental Figure1.

|    | clone |      | OD450  |        |
|----|-------|------|--------|--------|
|    |       |      | Gdn(+) | Gdn(-) |
| 1  | X     | 1E12 | 3.225  | 0.128  |
| 2  | X     | 1B12 | 1.232  | 0.390  |
| 3  | X     | 2H6  | 3.297  | 3.200  |
| 4  | X     | 2G7  | 3.537  | 0.643  |
| 5  | X     | 3H9  | 3.401  | 0.276  |
| 6  | X     | 4H5  | 0.134  | 0.120  |
| 7  | X     | 4E9  | 0.765  | 0.787  |
| 8  | X     | 4F9  | 0.117  | 1.433  |
| 9  | Y     | 5B4  | 0.127  | 0.118  |
| 10 | X     | 2C4  | 0.335  | 1.933  |
| 11 | X     | 3B1  | 0.559  | 0.330  |
| 12 | X     | 3B7  | 0.127  | 1.130  |
| 13 | X     | 4G4  | 0.483  | 1.269  |
| 14 | X     | 4A8  | 3.431  | 1.473  |
| 15 | X     | 4B8  | 3.416  | 1.501  |
| 16 | Y     | 2C5  | 0.978  | 0.519  |
| 17 | Y     | 2F5  | 3.267  | 3.280  |
| 18 | Y     | 2F6  | 1.006  | 1.066  |
| 19 | Y     | 2H10 | 3.450  | 3.334  |
| 20 | Y     | 3D10 | 3.472  | 3.190  |
| 21 | Y     | 4H10 | 3.331  | 0.383  |
| 22 | X     | 2H2  | 3.357  | 3.318  |
| 23 | X     | 3H6  | 0.433  | 2.782  |
| 24 | X     | 4F7  | 3.362  | 3.152  |
| 25 | X     | 5C12 | 3.316  | 3.662  |
| 26 | Y     | 1E8  | 3.215  | 3.414  |
| 27 | Y     | 1B12 | 3.554  | 3.290  |
| 28 | Y     | 2F9  | 0.340  | 1.017  |
| 29 | Y     | 3F1  | 3.554  | 3.214  |
| 30 | Y     | 3A6  | 3.538  | 3.394  |
| 31 | Y     | 5F4  | 3.399  | 3.308  |
| 32 | Y     | 5G4  | 3.166  | 3.296  |
| 33 | X     | 1H1  | 0.094  | 0.091  |
| 34 | X     | 1F3  | 0.111  | 0.097  |
| 35 | X     | 1H4  | 0.120  | 0.109  |
| 36 | X     | 1G9  | 0.127  | 0.119  |
| 37 | X     | 1G12 | 1.695  | 1.080  |
| 38 | X     | 2E9  | 1.640  | 0.132  |
| 39 | X     | 2F9  | 2.654  | 1.387  |
| 40 | X     | 2G9  | 0.232  | 0.148  |
| 41 | X     | 3G4  | 3.023  | 2.476  |
| 42 | X     | 3H5  | 3.443  | 2.323  |
| 43 | X     | 3D12 | 3.229  | 3.231  |
| 44 | X     | 4C1  | 0.387  | 0.361  |
| 45 | X     | 4H10 | 3.085  | 2.331  |
| 46 | X     | 5A11 | 0.361  | 0.257  |
| 47 | X     | 5A12 | 0.096  | 0.101  |
| 48 | Y     | 5G6  | 1.108  | 0.809  |
| 49 | Y     | 1B4  | 3.346  | 3.018  |
| 50 | Y     | 2A6  | 2.882  | 2.337  |
| 51 | Y     | 2F11 | 3.373  | 3.388  |
| 52 | Y     | 3G2  | 3.284  | 3.332  |
| 53 | Y     | 3E5  | 3.245  | 3.285  |
| 54 | Y     | 3F10 | 3.297  | 3.405  |
| 55 | Y     | 4D12 | 3.348  | 3.330  |

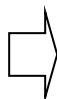

|    | clone |         | OD450  |        |
|----|-------|---------|--------|--------|
|    |       |         | Gdn(+) | Gdn(-) |
| 1  | Y     | 1B12*   | 1.064  | 2.143  |
| 2  | Y     | 1E8     | 3.215  | 3.414  |
| 3  | X     | 1G12    | 1.695  | 1.080  |
| 4  | X     | 2C4     | 0.335  | 1.933  |
| 5  | Y     | 2F11    | 3.373  | 3.388  |
| 6  | Y     | 2F6     | 1.006  | 1.066  |
| 7  | Y     | 2F9     | 2.654  | 1.387  |
| 8  | Y     | 2H10    | 3.450  | 3.334  |
| 9  | X     | 2H6-1   | 3.297  | 3.200  |
| 10 | Y     | 3A6     | 3.538  | 3.394  |
| 11 | X     | 3B7     | 0.127  | 1.130  |
| 12 | Y     | 3D10    | 3.472  | 3.190  |
| 13 | X     | 3D12    | 3.229  | 3.231  |
| 14 | Y     | 3F1     | 3.554  | 3.214  |
| 15 | Y     | 3F10    | 3.297  | 3.405  |
| 16 | Y     | 3G2     | 3.284  | 3.332  |
| 17 | X     | 3H5     | 3.443  | 2.323  |
| 18 | X     | 3H6-1   | 0.433  | 2.782  |
| 19 | Y     | 4D12    | 3.348  | 3.330  |
| 20 | X     | 4F7     | 3.362  | 3.152  |
| 21 | X     | 4F9-2** | 0.117  | 1.433  |
| 22 | X     | 4G4-1** | 0.483  | 1.269  |
| 23 | X     | 5C12    | 3.316  | 3.662  |
| 24 | Y     | 5G4     | 3.166  | 3.296  |

Gdn(+)<Gdn(-)

\*data of after 4th cloning

\*\* unstable clones

Supplemental Figure 2.

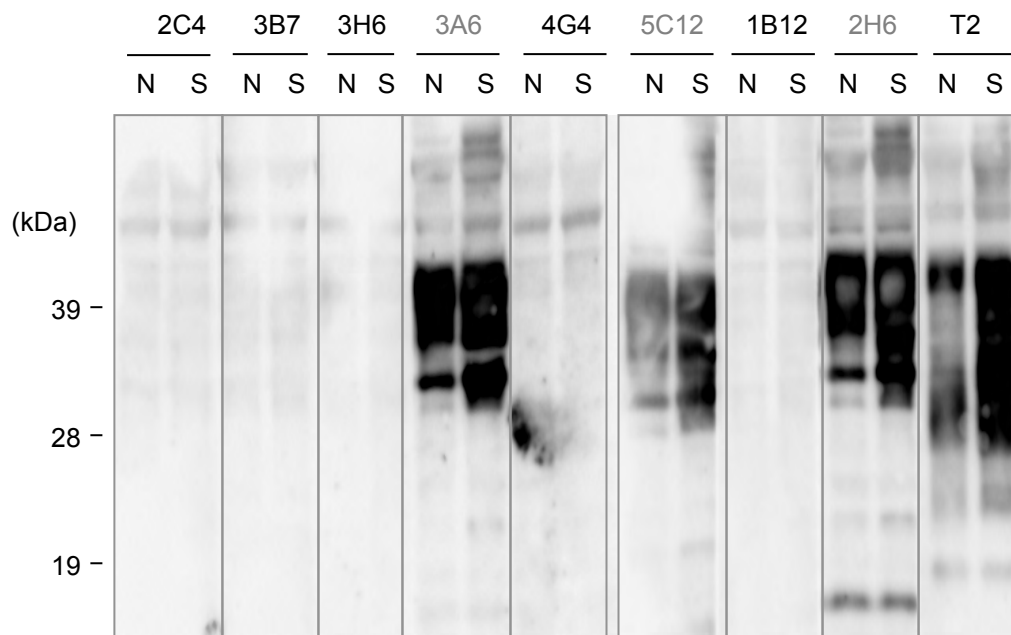

Supplemental Figure 3.

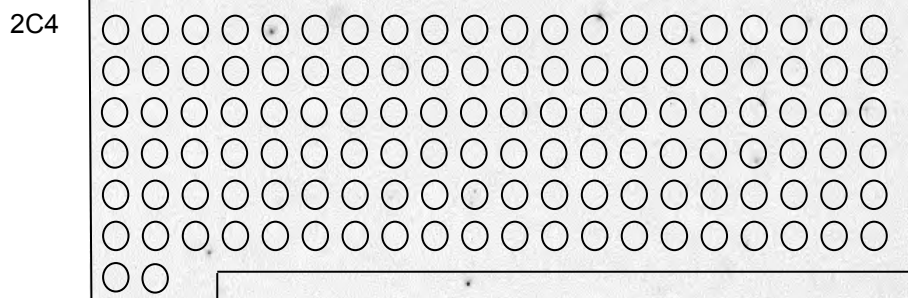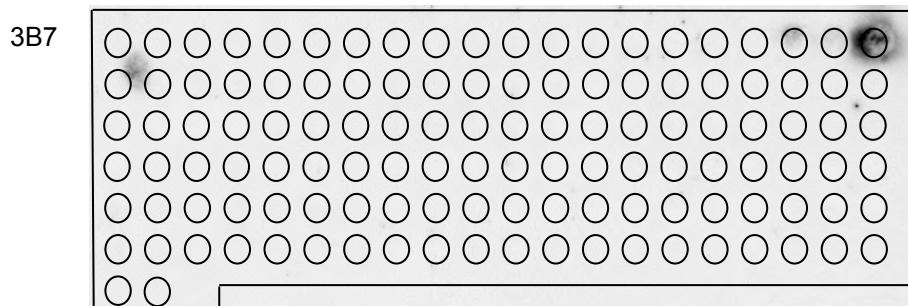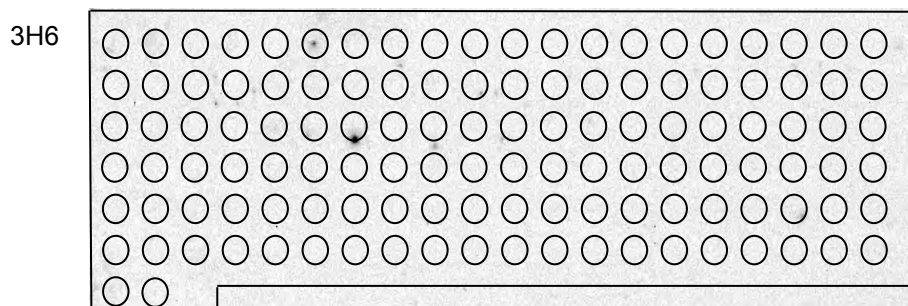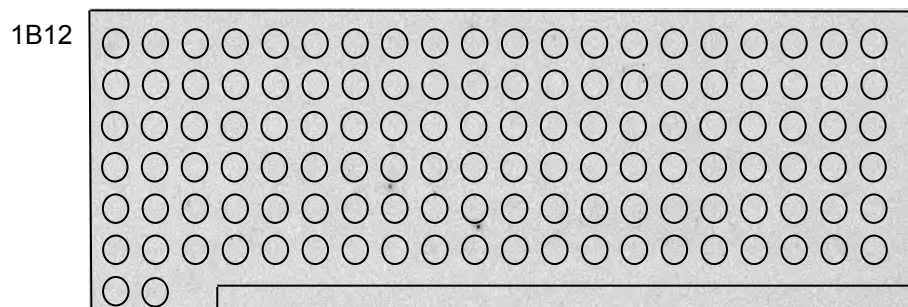

Long exposure:  
10min.

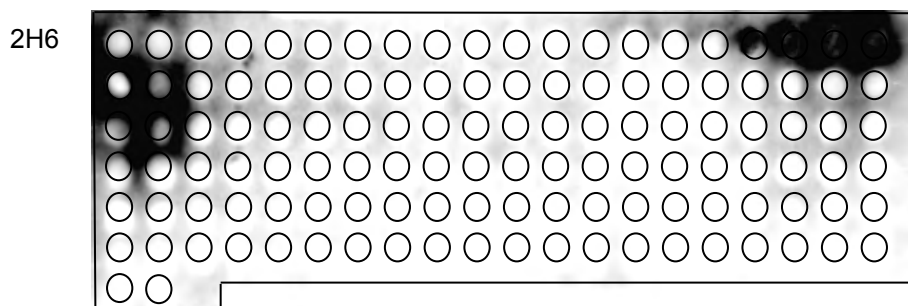

Exposure time:  
30sec.

Supplemental Figure 4.

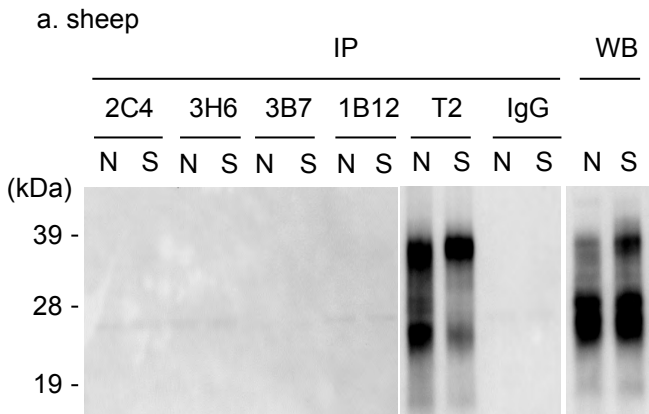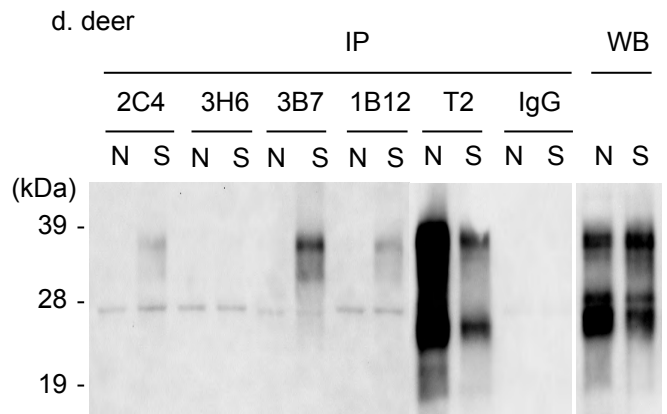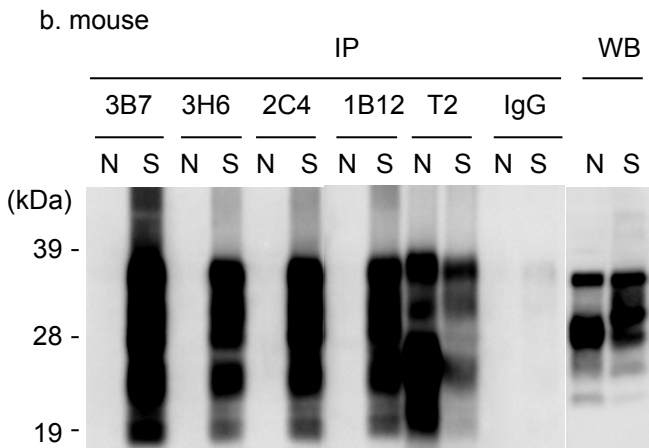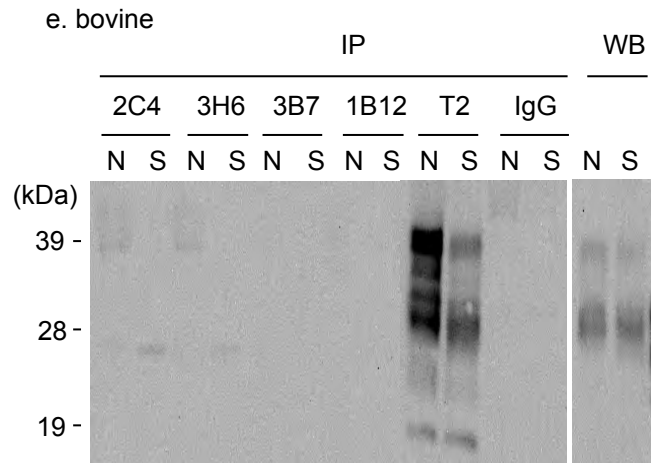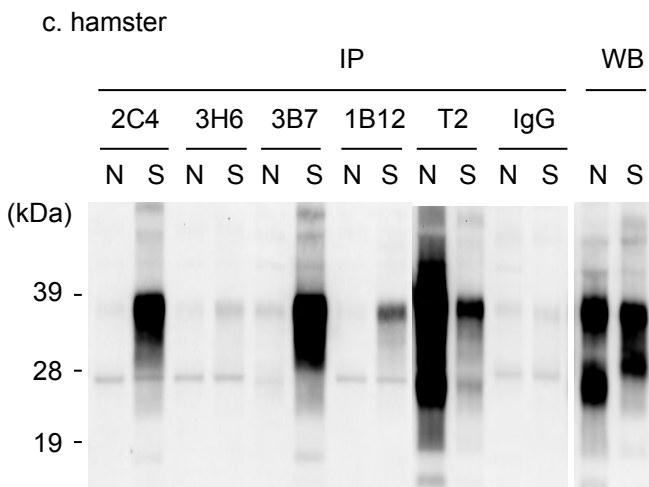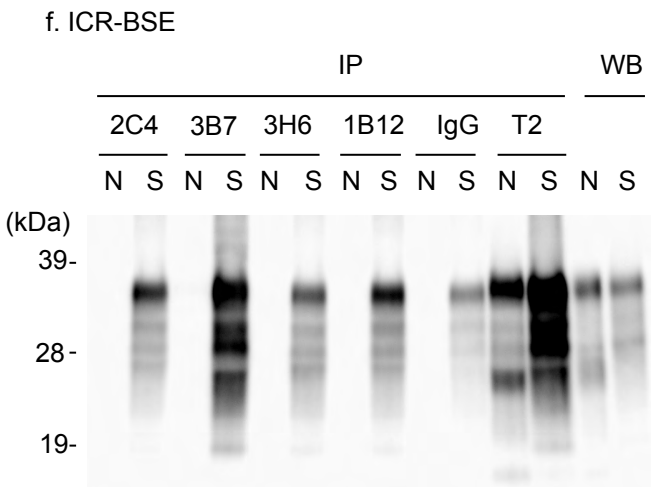

Supplemental Figure 5.

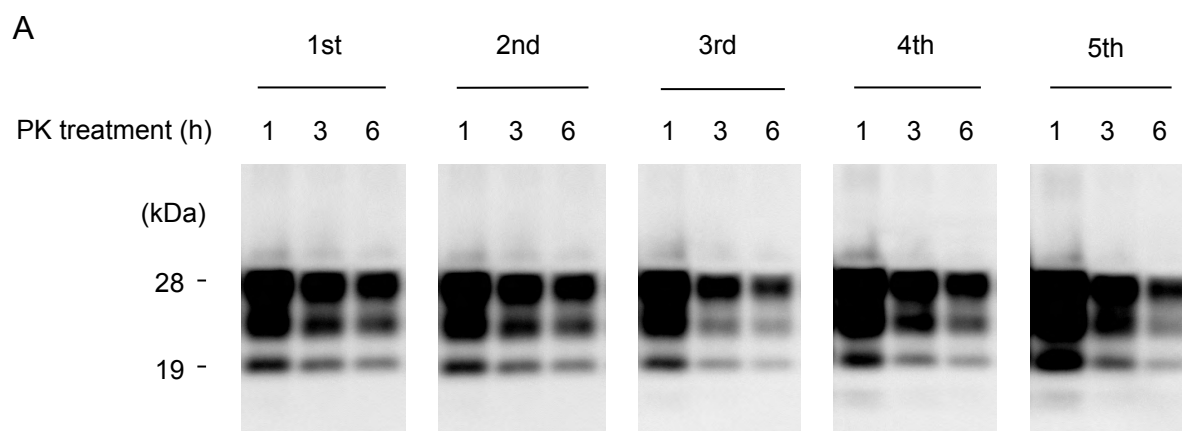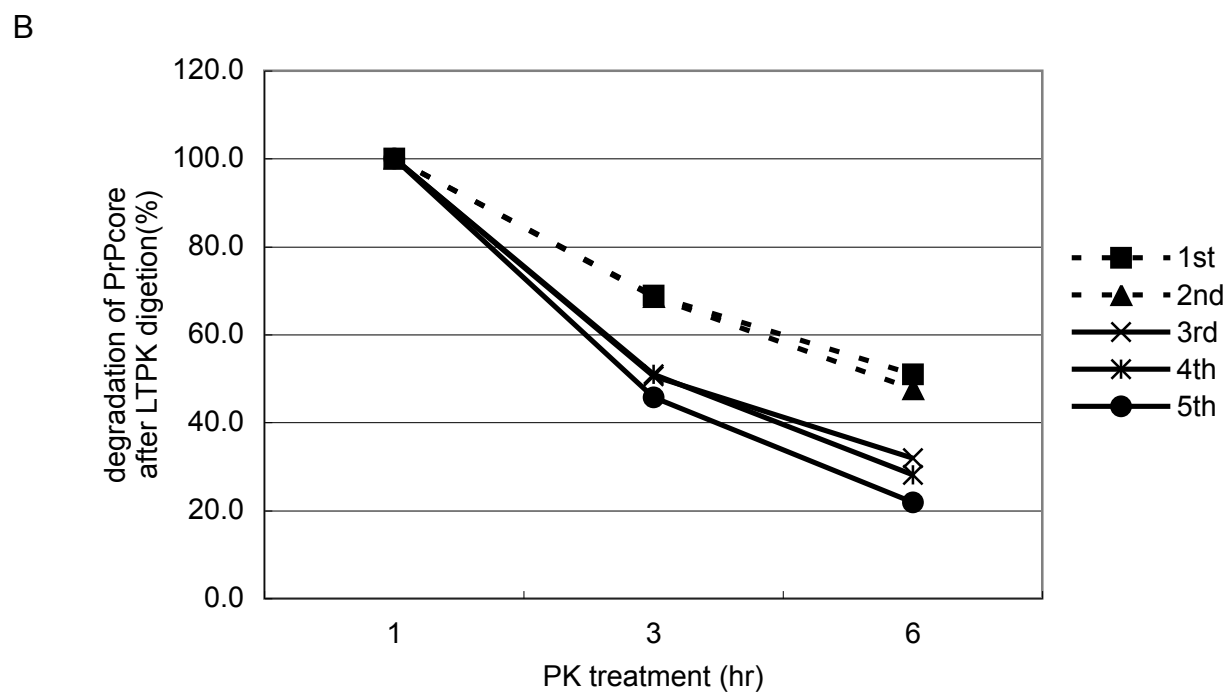

Supplemental Figure 6.

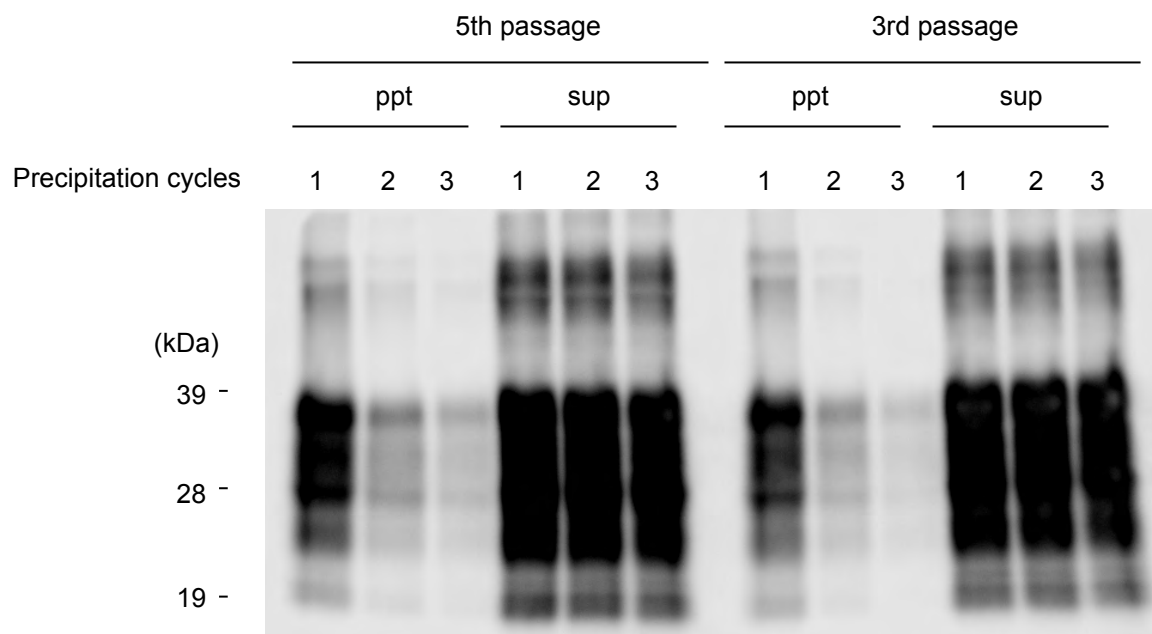

Supplement: supp_M109.058859_jbc.M109.058859-1.pdf [file supp_M109.058859_jbc.M109.058859-1.pdf]
